# Supplementary material for: Novel Pathogenic Mutations Identified from Whole-Genome Sequencing in Unsolved Cases of Patients Affected with Inherited Retinal Diseases
Source: MDPI journal article supplement (doi:10.3390/genes14020447), 2023-02-09
Supplement: s1 [file s1]

**Supplementary Table S1:** SpliceAI prediction scores of novel splicing variants.

| chromosomal position                                                                                                                                                                                                                                                                                                                                                                                                                                | DS_AG | DS_AL | DS_DG | DS_DL | DP_AG | DP_AL | DP_DG | DP_DL |
|-----------------------------------------------------------------------------------------------------------------------------------------------------------------------------------------------------------------------------------------------------------------------------------------------------------------------------------------------------------------------------------------------------------------------------------------------------|-------|-------|-------|-------|-------|-------|-------|-------|
| chr6:65704184:C>A                                                                                                                                                                                                                                                                                                                                                                                                                                   | 0.65  | 0.02  | 0.95  | 0.02  | 60    | 214   | 2     | 125   |
| chrX:85237775:C>G                                                                                                                                                                                                                                                                                                                                                                                                                                   | 0.68  | 0.04  | 0.58  | 0     | -3    | -1    | -117  | 435   |
| DS_AG, delta score of acceptor gain; DS_AL, delta score of acceptor loss; DS_DG, delta score of donor gain; DS_DL, delta score of donor loss; DP_AG, delta position of acceptor gain site relative to the mutation site; DP_AL, delta position of acceptor loss site relative to the mutation site; DP_DG, delta position of donor gain site relative to the mutation site; DP_DL, delta position of donor loss site relative to the mutation site. |       |       |       |       |       |       |       |       |

**Supplementary Table S2:** Primer sequences for RT-PCR.

|           |                                          |
|-----------|------------------------------------------|
| MEP-123-F | tgggaagcgaaagggctgacACATTTTATATTTACAGCA  |
| MEP-123-R | ggcagctcgactagtctagaAAGGAAAAGAAGAAACTGG  |
| MEP-395-F | tgggaagcgaaagggctgacTAATTGTTTAAAAACCTTTC |
| MEP-395-R | ggcagctcgactagtctagaCATATTGGGGCTCCGGATCC |

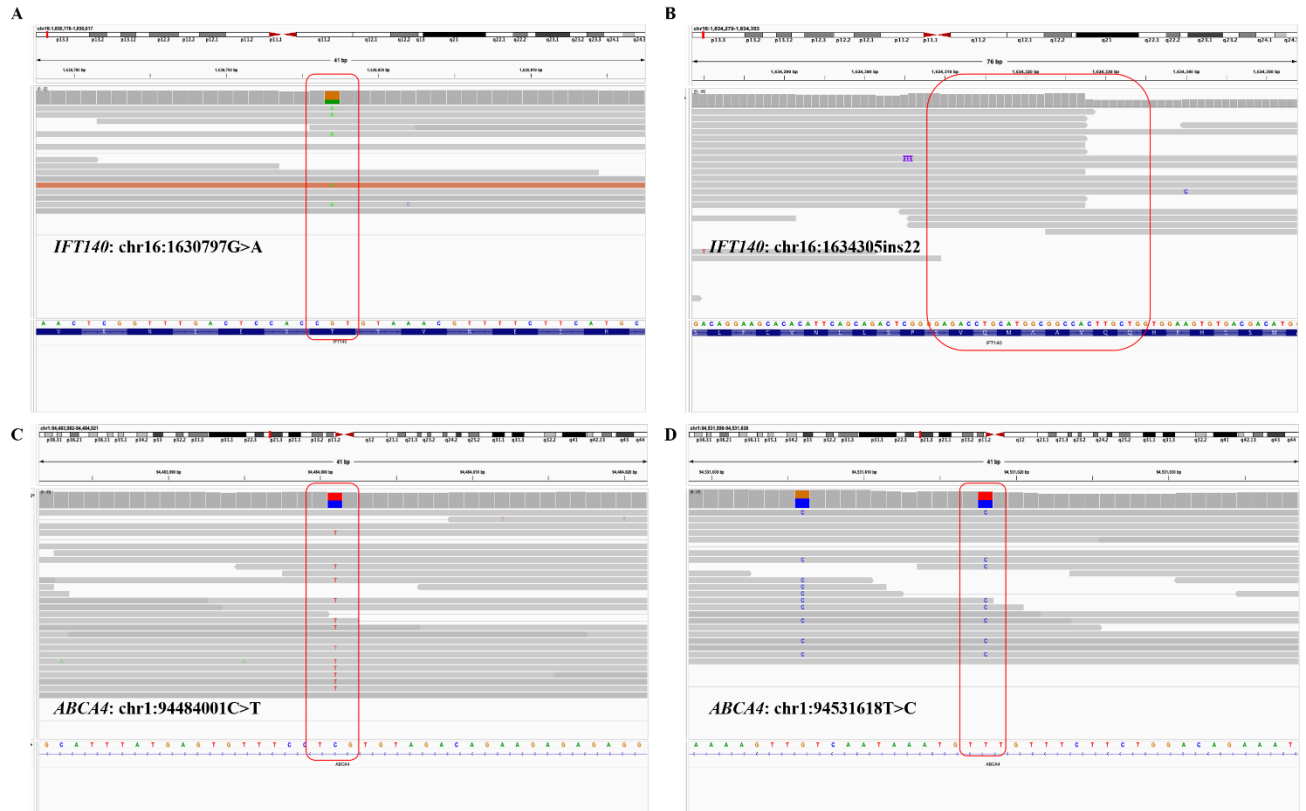

Figure S1: IGV plots of probands affected with IRD: (A,B) IGV plots of MEP-398 in *IFT140* (chr16:1630797G>A & chr16:1634305ins22) and (C-D) IGV plots of MEP-082 in gene *ABCA4*: (chr1:94484001C>T and chr1:94531618T>C);

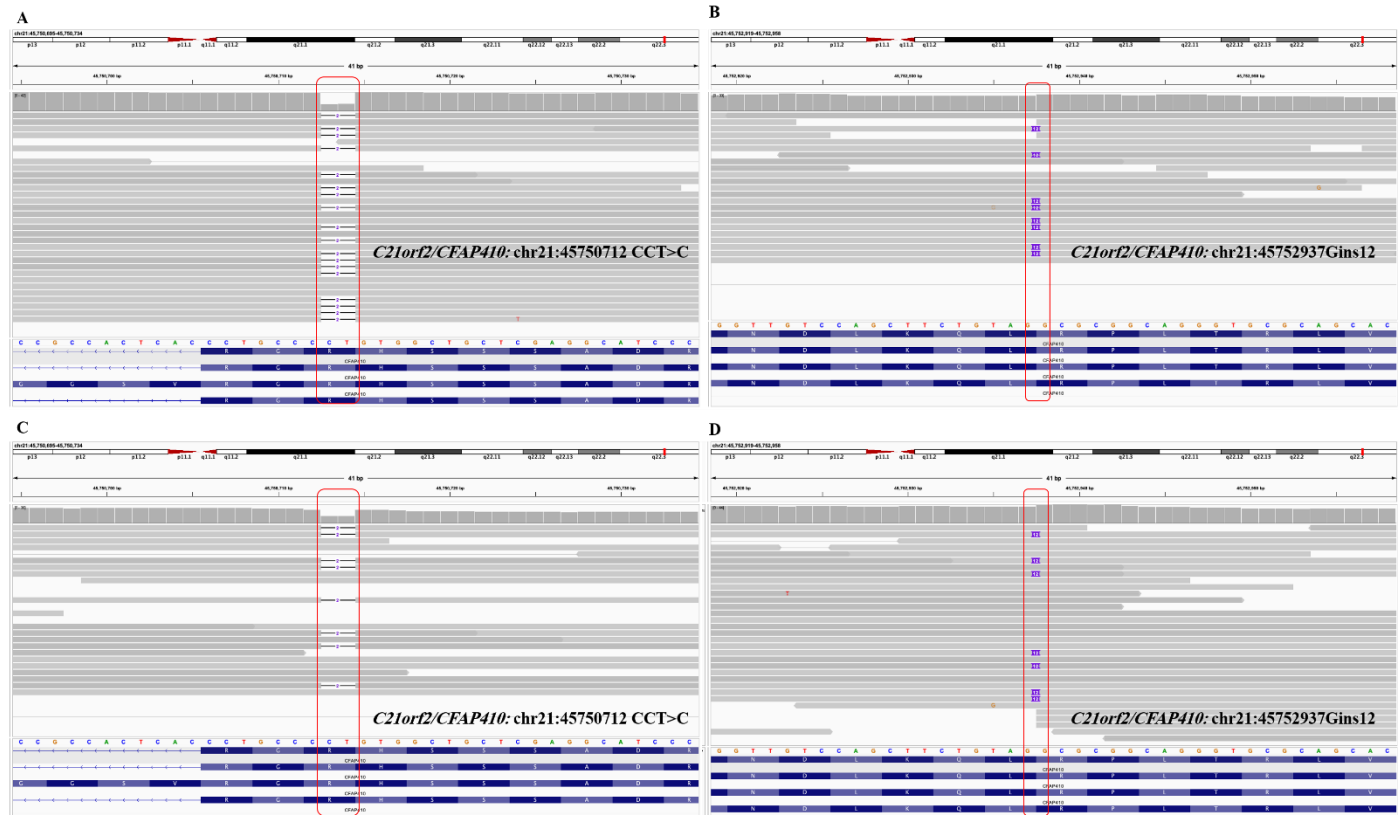

Figure S2: . IGV plots of siblings affected with IRD: (A-B) IGV plots of MEP-662 in gene *C21orf2/CFAP410* (chr21:45750712 CCT>C and chr21:45752937Gins12) and (C-D) IGV plots of MEP-663 in gene *C21orf2/CFAP410* (chr21:45750712 CCT>C and chr21:45752937Gins12)
